# Supplementary material for: An unprecedented non-classical polyinterhalogen anion made of [I2Cl]− and I2 at the 2-(p-tolyl)selenopheno[2,3-b]pyridinium cation template
Source: Royal Society of Chemistry journal article supplement (doi:10.1039/d2nj04689j), 2022-01-01
Supplement: d2nj04689j1.pdf [file d2nj04689j1.pdf]

## **An unprecedented non-classical poly-interhalogen anion made of $[\text{I}_2\text{Cl}]^-$ and $\text{I}_2$ at the 2-(*p*-tolyl)selenopheno[2,3-*b*]pyridinim cation template†**

M. Carla Aragoni, Enrico Podda, Massimiliano Arca, Anna Pintus, Vito Lippolis, Claudia Caltagirone, Ricardi H. Bartz, Eder J. Lenardão, Gelson Perin, Ricardo F. Schumacher, Simon J. Coles, James B. Orton

### **ELECTRONIC SUPPLEMENTARY INFORMATION**

**Table S1.** Crystal data and structure refinement parameters for compounds **1** and **2**.

| <b>Compound</b>                   | <b>1</b>                                             | <b>2</b>                                                |
|-----------------------------------|------------------------------------------------------|---------------------------------------------------------|
| Formula                           | C <sub>14</sub> H <sub>16</sub> ClNO <sub>2</sub> Se | C <sub>14</sub> H <sub>12</sub> ClI <sub>2.33</sub> NSe |
| $\rho_{calc.}/\text{g cm}^{-3}$   | 1.577                                                | 2.401                                                   |
| $\mu/\text{mm}^{-1}$              | 5.176                                                | 6.697                                                   |
| Formula Weight                    | 344.69                                               | 604.76                                                  |
| Colour                            | colourless                                           | dark red                                                |
| Shape                             | lath                                                 | (cut) block-shaped                                      |
| Size/mm <sup>3</sup>              | 0.09×0.04×0.01                                       | 0.13×0.06×0.05                                          |
| <i>T</i> /K                       | 100(2)                                               | 100(2)                                                  |
| Crystal System                    | triclinic                                            | triclinic                                               |
| Space Group                       | <i>P</i> -1                                          | <i>P</i> -1                                             |
| <i>a</i> /Å                       | 7.3040(2)                                            | 11.76310(10)                                            |
| <i>b</i> /Å                       | 9.1476(2)                                            | 14.0582(2)                                              |
| <i>c</i> /Å                       | 11.7026(2)                                           | 16.4528(2)                                              |
| $\alpha$ /°                       | 70.419(2)                                            | 94.0460(10)                                             |
| $\beta$ /°                        | 80.430(2)                                            | 95.4730(10)                                             |
| $\gamma$ /°                       | 88.427(2)                                            | 111.1560(10)                                            |
| <i>V</i> /Å <sup>3</sup>          | 726.09(3)                                            | 2509.62(5)                                              |
| <i>Z</i>                          | 2                                                    | 6                                                       |
| <i>Z</i> '                        | 1                                                    | 3                                                       |
| Wavelength/Å                      | 1.54184                                              | 0.71073                                                 |
| Radiation type                    | CuK $\alpha$                                         | MoK $\alpha$                                            |
| $\theta_{min}$ /°                 | 4.066                                                | 1.563                                                   |
| $\theta_{max}$ /°                 | 68.225                                               | 27.483                                                  |
| Measured Refl's.                  | 13289                                                | 115623                                                  |
| Indep't Refl's                    | 2632                                                 | 11505                                                   |
| Refl's $I \geq 2\sigma(I)$        | 2466                                                 | 10395                                                   |
| <i>R</i> <sub>int</sub>           | 0.0296                                               | 0.0361                                                  |
| Parameters                        | 189                                                  | 556                                                     |
| Restraints                        | 2                                                    | 15                                                      |
| Largest Peak                      | 0.626                                                | 1.010                                                   |
| Deepest Hole                      | -0.413                                               | -1.237                                                  |
| GooF                              | 1.074                                                | 1.108                                                   |
| <i>wR</i> <sub>2</sub> (all data) | 0.0711                                               | 0.0641                                                  |
| <i>wR</i> <sub>2</sub>            | 0.0700                                               | 0.0625                                                  |
| <i>R</i> <sub>1</sub> (all data)  | 0.0301                                               | 0.0322                                                  |
| <i>R</i> <sub>1</sub>             | 0.0277                                               | 0.0272                                                  |

**Table S2.** Bond lengths in Å for compounds **1** and **2**.

| <b>1</b> |     |          | <b>2</b> |                 |            |
|----------|-----|----------|----------|-----------------|------------|
| Se1      | C5  | 1.857(2) | I1       | I2A             | 2.7976(8)  |
| Se1      | C7  | 1.909(2) | I1       | I2B             | 2.783(9)   |
| N1       | C1  | 1.342(3) | I1       | C11             | 2.6947(10) |
| N1       | C5  | 1.350(3) | I3       | I4A             | 2.826(3)   |
| C1       | C2  | 1.378(4) | I3       | I4B             | 2.7097(15) |
| C2       | C3  | 1.382(4) | I3       | C12             | 2.7779(9)  |
| C3       | C4  | 1.397(3) | I5       | I6A             | 2.830(6)   |
| C4       | C5  | 1.401(3) | I5       | I6B             | 2.790(5)   |
| C4       | C6  | 1.435(3) | I5       | C13             | 2.7019(9)  |
| C6       | C7  | 1.362(3) | I7       | I7 <sup>i</sup> | 2.7430(11) |
| C7       | C8  | 1.468(3) | Se1      | C5              | 1.866(3)   |
| C8       | C9  | 1.389(3) | Se1      | C7              | 1.903(3)   |
| C8       | C13 | 1.398(3) | N1       | C1              | 1.348(4)   |
| C9       | C10 | 1.388(3) | N1       | C5              | 1.344(4)   |
| C10      | C11 | 1.398(3) | C1       | C2              | 1.380(5)   |
| C11      | C12 | 1.383(4) | C2       | C3              | 1.383(5)   |
| C11      | C14 | 1.515(3) | C3       | C4              | 1.399(5)   |
| C12      | C13 | 1.395(3) | C4       | C5              | 1.406(5)   |
|          |     |          | C4       | C6              | 1.435(5)   |
|          |     |          | C6       | C7              | 1.354(5)   |
|          |     |          | C7       | C8              | 1.470(4)   |
|          |     |          | C8       | C9              | 1.402(5)   |
|          |     |          | C8       | C13             | 1.399(5)   |
|          |     |          | C9       | C10             | 1.381(5)   |
|          |     |          | C10      | C11             | 1.396(5)   |
|          |     |          | C11      | C12             | 1.392(5)   |
|          |     |          | C11      | C14             | 1.501(5)   |
|          |     |          | C12      | C13             | 1.386(5)   |
|          |     |          | Se2      | C19             | 1.859(3)   |
|          |     |          | Se2      | C21             | 1.903(3)   |
|          |     |          | N2       | C15             | 1.340(4)   |
|          |     |          | N2       | C19             | 1.348(4)   |
|          |     |          | C15      | C16             | 1.382(5)   |
|          |     |          | C16      | C17             | 1.389(5)   |
|          |     |          | C17      | C18             | 1.397(5)   |
|          |     |          | C18      | C19             | 1.405(5)   |
|          |     |          | C18      | C20             | 1.436(5)   |
|          |     |          | C20      | C21             | 1.357(5)   |
|          |     |          | C21      | C22             | 1.465(5)   |
|          |     |          | C22      | C23             | 1.399(5)   |
|          |     |          | C22      | C27             | 1.397(5)   |
|          |     |          | C23      | C24             | 1.388(5)   |
|          |     |          | C24      | C25             | 1.393(5)   |
|          |     |          | C25      | C26             | 1.396(5)   |
|          |     |          | C25      | C28             | 1.503(5)   |
|          |     |          | C26      | C27             | 1.390(5)   |
|          |     |          | Se3      | C33             | 1.862(3)   |
|          |     |          | Se3      | C35             | 1.906(3)   |
|          |     |          | N3       | C29             | 1.350(4)   |
|          |     |          | N3       | C33             | 1.343(4)   |
|          |     |          | C29      | C30             | 1.376(5)   |
|          |     |          | C30      | C31             | 1.386(5)   |
|          |     |          | C31      | C32             | 1.402(5)   |
|          |     |          | C32      | C33             | 1.398(5)   |
|          |     |          | C32      | C34             | 1.435(5)   |
|          |     |          | C34      | C35             | 1.361(5)   |
|          |     |          | C35      | C36             | 1.464(4)   |
|          |     |          | C36      | C37             | 1.402(5)   |
|          |     |          | C36      | C41             | 1.403(4)   |
|          |     |          | C37      | C38             | 1.384(5)   |
|          |     |          | C38      | C39             | 1.395(5)   |
|          |     |          | C39      | C40             | 1.395(5)   |
|          |     |          | C39      | C42             | 1.503(4)   |
|          |     |          | C40      | C41             | 1.386(5)   |

Simmety code:  $i -x, -y, -z.$

**Table S3.** Bond angles in ° for compounds **1** and **2**.

| <b>1</b> |     |     |            | <b>2</b> |     |     |            |
|----------|-----|-----|------------|----------|-----|-----|------------|
| C5       | Se1 | C7  | 85.52(10)  | C11      | I1  | I2A | 178.77(4)  |
| C1       | N1  | C5  | 121.2(2)   | C11      | I1  | I2B | 169.9(5)   |
| N1       | C1  | C2  | 120.2(2)   | I4B      | I3  | C12 | 173.0(2)   |
| C1       | C2  | C3  | 120.4(2)   | C12      | I3  | I4A | 172.55(14) |
| C2       | C3  | C4  | 119.2(2)   | C13      | I5  | I6A | 175.23(18) |
| C3       | C4  | C5  | 118.2(2)   | C13      | I5  | I6B | 174.92(18) |
| C3       | C4  | C6  | 129.0(2)   | C5       | Se1 | C7  | 85.87(14)  |
| C5       | C4  | C6  | 112.7(2)   | C5       | N1  | C1  | 121.5(3)   |
| N1       | C5  | Se1 | 125.27(19) | N1       | C1  | C2  | 120.2(3)   |
| N1       | C5  | C4  | 120.7(2)   | C1       | C2  | C3  | 120.0(3)   |
| C4       | C5  | Se1 | 114.00(17) | C2       | C3  | C4  | 119.7(3)   |
| C7       | C6  | C4  | 115.2(2)   | C3       | C4  | C5  | 117.9(3)   |
| C6       | C7  | Se1 | 112.55(17) | C3       | C4  | C6  | 129.3(3)   |
| C6       | C7  | C8  | 128.0(2)   | C5       | C4  | C6  | 112.8(3)   |
| C8       | C7  | Se1 | 119.43(17) | N1       | C5  | Se1 | 126.1(2)   |
| C9       | C8  | C7  | 120.3(2)   | N1       | C5  | C4  | 120.7(3)   |
| C9       | C8  | C13 | 118.1(2)   | C4       | C5  | Se1 | 113.2(2)   |
| C13      | C8  | C7  | 121.6(2)   | C7       | C6  | C4  | 115.6(3)   |
| C10      | C9  | C8  | 120.8(2)   | C6       | C7  | Se1 | 112.5(2)   |
| C9       | C10 | C11 | 121.4(2)   | C6       | C7  | C8  | 127.9(3)   |
| C10      | C11 | C14 | 120.0(2)   | C8       | C7  | Se1 | 119.6(2)   |
| C12      | C11 | C10 | 117.7(2)   | C9       | C8  | C7  | 120.7(3)   |
| C12      | C11 | C14 | 122.4(2)   | C13      | C8  | C7  | 121.6(3)   |
| C11      | C12 | C13 | 121.4(2)   | C13      | C8  | C9  | 117.7(3)   |
| C12      | C13 | C8  | 120.6(2)   | C10      | C9  | C8  | 120.9(3)   |
|          |     |     |            | C9       | C10 | C11 | 121.3(3)   |
|          |     |     |            | C10      | C11 | C14 | 120.8(3)   |
|          |     |     |            | C12      | C11 | C10 | 117.9(3)   |
|          |     |     |            | C12      | C11 | C14 | 121.3(3)   |
|          |     |     |            | C13      | C12 | C11 | 121.1(3)   |
|          |     |     |            | C12      | C13 | C8  | 121.1(3)   |
|          |     |     |            | C19      | Se2 | C21 | 85.91(14)  |
|          |     |     |            | C15      | N2  | C19 | 121.7(3)   |
|          |     |     |            | N2       | C15 | C16 | 120.4(3)   |
|          |     |     |            | C15      | C16 | C17 | 119.7(3)   |
|          |     |     |            | C16      | C17 | C18 | 119.6(3)   |
|          |     |     |            | C17      | C18 | C19 | 118.3(3)   |
|          |     |     |            | C17      | C18 | C20 | 129.2(3)   |
|          |     |     |            | C19      | C18 | C20 | 112.5(3)   |
|          |     |     |            | N2       | C19 | Se2 | 126.2(2)   |
|          |     |     |            | N2       | C19 | C18 | 120.3(3)   |
|          |     |     |            | C18      | C19 | Se2 | 113.5(2)   |
|          |     |     |            | C21      | C20 | C18 | 115.7(3)   |
|          |     |     |            | C20      | C21 | Se2 | 112.3(2)   |
|          |     |     |            | C20      | C21 | C22 | 128.2(3)   |
|          |     |     |            | C22      | C21 | Se2 | 119.5(2)   |
|          |     |     |            | C23      | C22 | C21 | 120.0(3)   |
|          |     |     |            | C27      | C22 | C21 | 122.1(3)   |
|          |     |     |            | C27      | C22 | C23 | 118.0(3)   |
|          |     |     |            | C24      | C23 | C22 | 120.5(3)   |
|          |     |     |            | C23      | C24 | C25 | 121.7(3)   |
|          |     |     |            | C24      | C25 | C26 | 117.8(3)   |
|          |     |     |            | C24      | C25 | C28 | 120.2(3)   |
|          |     |     |            | C26      | C25 | C28 | 122.0(3)   |
|          |     |     |            | C27      | C26 | C25 | 120.9(3)   |
|          |     |     |            | C26      | C27 | C22 | 121.2(3)   |
|          |     |     |            | C33      | Se3 | C35 | 85.82(14)  |
|          |     |     |            | C33      | N3  | C29 | 121.2(3)   |
|          |     |     |            | N3       | C29 | C30 | 120.3(3)   |
|          |     |     |            | C29      | C30 | C31 | 120.0(3)   |
|          |     |     |            | C30      | C31 | C32 | 119.4(3)   |
|          |     |     |            | C31      | C32 | C34 | 128.7(3)   |

| 1 | 2   |     |     |          |
|---|-----|-----|-----|----------|
|   | C33 | C32 | C31 | 118.0(3) |
|   | C33 | C32 | C34 | 113.2(3) |
|   | N3  | C33 | Se3 | 125.6(2) |
|   | N3  | C33 | C32 | 121.0(3) |
|   | C32 | C33 | Se3 | 113.4(2) |
|   | C35 | C34 | C32 | 115.1(3) |
|   | C34 | C35 | Se3 | 112.4(2) |
|   | C34 | C35 | C36 | 128.9(3) |
|   | C36 | C35 | Se3 | 118.7(2) |
|   | C37 | C36 | C35 | 121.5(3) |
|   | C37 | C36 | C41 | 117.9(3) |
|   | C41 | C36 | C35 | 120.6(3) |
|   | C38 | C37 | C36 | 120.5(3) |
|   | C37 | C38 | C39 | 121.6(3) |
|   | C38 | C39 | C42 | 121.5(3) |
|   | C40 | C39 | C38 | 118.0(3) |
|   | C40 | C39 | C42 | 120.5(3) |
|   | C41 | C40 | C39 | 120.9(3) |
|   | C40 | C41 | C36 | 121.1(3) |

**Table S4.** Hydrogen bonding interactions found in compounds **1** and **2**. Distances and angles are reported in Å and °, respectively.

|                    | 1                         | 2           |             |             |
|--------------------|---------------------------|-------------|-------------|-------------|
|                    | N1–H1...Cl1               | N1–H1...Cl1 | N2–H2...Cl2 | N3–H3...Cl3 |
| $d_{D-A}$          | 3.022(2)                  | 3.054(3)    | 3.066(3)    | 3.076(3)    |
| $d_{H-A}$          | 2.011(19)                 | 2.389(8)    | 2.254(8)    | 2.258(8)    |
| $\alpha_{D-H...A}$ | 174(3)                    | 153.97(18)  | 153.30(18)  | 154.62(18)  |
|                    | O1–H1AA...Cl1             |             |             |             |
| $d_{D-A}$          | 3.209(2)                  |             |             |             |
| $d_{H-A}$          | 2.363(6)                  |             |             |             |
| $\alpha_{D-H...A}$ | 172.9(2)                  |             |             |             |
|                    | O2–H2A...Cl1              |             |             |             |
| $d_{D-A}$          | 3.190(9)                  |             |             |             |
| $d_{H-A}$          | 2.212(6)                  |             |             |             |
| $\alpha_{D-H...A}$ | 167.8(2)                  |             |             |             |
|                    | C1–H1A...Cl1 <sup>i</sup> |             |             |             |
| $d_{D-A}$          | 3.484(2)                  |             |             |             |
| $d_{H-A}$          | 2.580(6)                  |             |             |             |
| $\alpha_{D-H...A}$ | 159.2(2)                  |             |             |             |

Symmetry code: <sup>i</sup> =  $-x, 2-y, 2-z$ .

**Table S5.** Optimised geometry calculated for **L** at DFT level (mPW1PW//LANL2DZ(d,p)) in the gas phase (total charge = 0, spin multiplicity = 1) in orthogonal Cartesian coordinate format (*Z* = atomic number).

| Atom number | <i>Z</i> | <i>x</i>  | <i>y</i>  | <i>z</i>  |
|-------------|----------|-----------|-----------|-----------|
| 1           | 34       | 0.869306  | -1.385345 | 0.145371  |
| 2           | 7        | 3.663004  | -0.850941 | 0.078662  |
| 3           | 6        | 4.669798  | 0.021267  | -0.017247 |
| 4           | 1        | 5.673861  | -0.400849 | 0.028745  |
| 5           | 6        | 4.490235  | 1.406459  | -0.170239 |
| 6           | 1        | 5.359539  | 2.056891  | -0.243659 |
| 7           | 6        | 3.201971  | 1.925826  | -0.226237 |
| 8           | 1        | 3.031516  | 2.995261  | -0.346266 |
| 9           | 6        | 2.117915  | 1.038020  | -0.124141 |
| 10          | 6        | 2.438154  | -0.337223 | 0.024502  |
| 11          | 6        | 0.710046  | 1.314668  | -0.158575 |
| 12          | 1        | 0.322923  | 2.321901  | -0.301177 |
| 13          | 6        | -0.113014 | 0.227785  | -0.042553 |
| 14          | 6        | -1.580453 | 0.228112  | -0.037063 |
| 15          | 6        | -2.319687 | -0.885074 | -0.466973 |
| 16          | 1        | -1.799100 | -1.771678 | -0.829062 |
| 17          | 6        | -3.714315 | -0.865777 | -0.465043 |
| 18          | 1        | -4.260255 | -1.743966 | -0.809413 |
| 19          | 6        | -4.425186 | 0.261332  | -0.036735 |
| 20          | 6        | -3.685262 | 1.373037  | 0.397972  |
| 21          | 1        | -4.209766 | 2.261699  | 0.750222  |
| 22          | 6        | -2.294278 | 1.358792  | 0.404394  |
| 23          | 1        | -1.750213 | 2.224528  | 0.777647  |
| 24          | 6        | -5.929311 | 0.285965  | -0.031129 |
| 25          | 1        | -6.314642 | 1.104229  | -0.653381 |
| 26          | 1        | -6.318751 | 0.438930  | 0.983983  |
| 27          | 1        | -6.344131 | -0.653057 | -0.413069 |

**Table S6.** Optimised geometry calculated for [HL]<sup>+</sup> at DFT level (mPW1PW//LANL2DZ(d,p)) in the gas phase (total charge = 1, spin multiplicity = 1) in orthogonal Cartesian coordinate format (*Z* = atomic number).

| Atom number | <i>Z</i> | <i>x</i>  | <i>y</i>  | <i>z</i>  |
|-------------|----------|-----------|-----------|-----------|
| 1           | 34       | -0.812267 | -1.363570 | -0.182248 |
| 2           | 7        | -3.640158 | -0.775411 | -0.107542 |
| 3           | 1        | -3.822192 | -1.768939 | -0.222691 |
| 4           | 6        | -4.700031 | 0.057155  | -0.013464 |
| 5           | 1        | -5.682250 | -0.401599 | -0.070818 |
| 6           | 6        | -4.491974 | 1.418163  | 0.146786  |
| 7           | 1        | -5.351471 | 2.078332  | 0.222699  |
| 8           | 6        | -3.188909 | 1.917323  | 0.207467  |
| 9           | 1        | -3.020237 | 2.985488  | 0.334719  |
| 10          | 6        | -2.093487 | 1.044788  | 0.103734  |
| 11          | 6        | -2.363084 | -0.339790 | -0.057516 |
| 12          | 6        | -0.696025 | 1.345144  | 0.150064  |
| 13          | 1        | -0.331647 | 2.357763  | 0.302398  |
| 14          | 6        | 0.149024  | 0.273974  | 0.032208  |
| 15          | 6        | 1.606210  | 0.253437  | 0.025375  |
| 16          | 6        | 2.326787  | -0.905980 | 0.359907  |
| 17          | 1        | 1.802010  | -1.815417 | 0.657154  |
| 18          | 6        | 3.718478  | -0.905510 | 0.358132  |
| 19          | 1        | 4.253941  | -1.814341 | 0.628370  |
| 20          | 6        | 4.441884  | 0.247621  | 0.022704  |
| 21          | 6        | 3.717535  | 1.404991  | -0.316065 |
| 22          | 1        | 4.255528  | 2.310891  | -0.593265 |
| 23          | 6        | 2.329347  | 1.413850  | -0.318711 |
| 24          | 1        | 1.801002  | 2.317527  | -0.616032 |
| 25          | 6        | 5.942806  | 0.255810  | 0.018525  |
| 26          | 1        | 6.330233  | 0.996418  | 0.729833  |
| 27          | 1        | 6.328778  | 0.526740  | -0.972376 |
| 28          | 1        | 6.351112  | -0.722858 | 0.288582  |



**Table S7.** Selected optimised bond lengths (Å) and angles (°) calculated at the DFT level (mPW1PW//LANL2DZ(d,p)) in the gas phase for **L** and [HL]<sup>+</sup> and corresponding structural data; numbering scheme as in Figure S.

|               | <b>L</b><br>(calculated) | [HL] <sup>+</sup><br>(calculated) | [HL] <sup>+</sup><br>(experimental) <sup>a</sup> |
|---------------|--------------------------|-----------------------------------|--------------------------------------------------|
| N1-C1         | 1.336                    | 1.351                             | 1.344                                            |
| N1-C5         | 1.329                    | 1.350                             | 1.347                                            |
| Se1-C5        | 1.891                    | 1.862                             | 1.859                                            |
| Se1-C7        | 1.898                    | 1.911                             | 1.906                                            |
| C1-C2         | 1.405                    | 1.386                             | 1.379                                            |
| C2-C3         | 1.390                    | 1.397                             | 1.386                                            |
| C3-C4         | 1.405                    | 1.404                             | 1.399                                            |
| C4-C5         | 1.420                    | 1.420                             | 1.401                                            |
| C4-C6         | 1.435                    | 1.430                             | 1.435                                            |
| C6-C7         | 1.368                    | 1.369                             | 1.360                                            |
| C7-C8         | 1.468                    | 1.457                             | 1.466                                            |
| C8-C9         | 1.408                    | 1.410                             | 1.397                                            |
| C8-C13        | 1.404                    | 1.406                             | 1.399                                            |
| C9-C10        | 1.391                    | 1.388                             | 1.387                                            |
| C10-C11       | 1.404                    | 1.407                             | 1.395                                            |
| C11-C12       | 1.400                    | 1.402                             | 1.392                                            |
| C11-C14       | 1.504                    | 1.501                             | 1.507                                            |
| C12-C13       | 1.395                    | 1.392                             | 1.390                                            |
| N1-H1         |                          | 1.017                             |                                                  |
| C1-N1-C5      | 116.06                   | 122.72                            | 121.37                                           |
| N1-C5-Se1     | 123.21                   | 127.42                            | 125.69                                           |
| C5-Se1-C7     | 87.25                    | 86.58                             | 85.75                                            |
| Se1-C7-C8-C13 | 28.02                    | 23.94                             | 2.66                                             |
| C1-N1-C5-Se1  | 179.82                   | 179.65                            | 179.51                                           |

<sup>a</sup>Average calculated on the three independent [HL]<sup>+</sup> cations in the asymmetric unit of **2**.

**Table S8.** Optimised geometry calculated for  $\{[\text{HL}]^+\cdots[\text{Cl-I-I}]^-\}$  (**I**) at DFT level (mPW1PW//LANL2DZ(d,p)) in the gas phase (total charge = 0, spin multiplicity = 1) in orthogonal Cartesian coordinate format ( $Z$  = atomic number).

| Atom number | $Z$ | $x$       | $y$       | $z$       |
|-------------|-----|-----------|-----------|-----------|
| 1           | 34  | -1.587353 | 0.744517  | 0.901816  |
| 2           | 7   | 0.254055  | 2.768554  | 0.073610  |
| 3           | 1   | 0.745077  | 2.521551  | 1.007615  |
| 4           | 6   | 0.723225  | 3.695462  | -0.769667 |
| 5           | 1   | 1.632969  | 4.204235  | -0.464805 |
| 6           | 6   | 0.057947  | 3.959046  | -1.963859 |
| 7           | 1   | 0.454759  | 4.712236  | -2.638849 |
| 8           | 6   | -1.101740 | 3.249124  | -2.276911 |
| 9           | 1   | -1.627447 | 3.443492  | -3.210599 |
| 10          | 6   | -1.588801 | 2.278418  | -1.387568 |
| 11          | 6   | -0.854751 | 2.065985  | -0.193347 |
| 12          | 6   | -2.734639 | 1.425587  | -1.499470 |
| 13          | 1   | -3.382192 | 1.438132  | -2.372998 |
| 14          | 6   | -2.920282 | 0.563883  | -0.451902 |
| 15          | 6   | -3.999911 | -0.413771 | -0.291622 |
| 16          | 6   | -5.262148 | -0.185690 | -0.872381 |
| 17          | 1   | -5.446379 | 0.740200  | -1.414329 |
| 18          | 6   | -6.286585 | -1.115280 | -0.732741 |
| 19          | 1   | -7.256428 | -0.911188 | -1.186606 |
| 20          | 6   | -6.099649 | -2.303593 | -0.006852 |
| 21          | 6   | -4.845459 | -2.524040 | 0.575278  |
| 22          | 1   | -4.670022 | -3.438498 | 1.140844  |
| 23          | 6   | -3.812065 | -1.598633 | 0.437999  |
| 24          | 1   | -2.840600 | -1.817789 | 0.881475  |
| 25          | 6   | -7.217570 | -3.298063 | 0.140714  |
| 26          | 1   | -6.903297 | -4.167076 | 0.728021  |
| 27          | 1   | -7.558958 | -3.655680 | -0.839329 |
| 28          | 1   | -8.083424 | -2.845473 | 0.641254  |
| 29          | 53  | 2.667652  | -0.180075 | 0.935505  |
| 30          | 53  | 4.015559  | -1.881346 | -0.780448 |
| 31          | 17  | 1.162160  | 1.673880  | 2.599301  |

**Table S9.** Selected optimised bond lengths (Å) and angles (°) calculated at the DFT level (mPW1PW//LANL2DZ(d,p)) in the gas phase for {[HL]<sup>+</sup>...[Cl-I-I]<sup>-</sup>} (**I**) and {[HL]<sup>+</sup>...[I-I-Cl]<sup>-</sup>} (**II**) with corresponding structural data and for {[HL]<sup>+</sup>...[I-I-Cl]<sup>-</sup>} (**III**); numbering scheme as in Figure S.

|                       | {[HL] <sup>+</sup> ...[Cl-I-I] <sup>-</sup> }<br>(calculated) | {[HL] <sup>+</sup> ...[Cl-I-I] <sup>-</sup> }<br>(experimental) <sup>a</sup> | {[HL] <sup>+</sup> ...[I-I-Cl] <sup>-</sup> }<br>(calculated) |
|-----------------------|---------------------------------------------------------------|------------------------------------------------------------------------------|---------------------------------------------------------------|
| N1-C1                 | 1.338                                                         | 1.346                                                                        | 1.340                                                         |
| N1-C5                 | 1.340                                                         | 1.345                                                                        | 1.341                                                         |
| Se1-C5                | 1.866                                                         | 1.862                                                                        | 1.866                                                         |
| Se1-C7                | 1.908                                                         | 1.904                                                                        | 1.910                                                         |
| N1-H1                 | 1.084                                                         | /                                                                            | 1.056                                                         |
| H1-C11                | 1.851                                                         | /                                                                            | /                                                             |
| H1-I1                 | /                                                             | /                                                                            | 2.331                                                         |
| N1-C11                | 2.899                                                         | 3.066                                                                        | /                                                             |
| N1-I1                 | /                                                             | /                                                                            | 3.352                                                         |
| C11-I1                | 2.911                                                         | 2.725                                                                        | /                                                             |
| I1-I2                 | 2.767                                                         | 2.820                                                                        | 3.047                                                         |
| I2-C11                | /                                                             | /                                                                            | 2.501                                                         |
| C1-N1-C5              | 121.87                                                        | 121.46                                                                       | 122.39                                                        |
| N1-C5-Se1             | 125.41                                                        | 125.94                                                                       | 126.08                                                        |
| C5-Se1-C7             | 85.69                                                         | 85.87                                                                        | 85.74                                                         |
| N1-H1-C11             | 161.37                                                        | /                                                                            | /                                                             |
| <sup>a</sup> N1-H1-I1 | /                                                             | /                                                                            | 162.10                                                        |
| H1-C11-I1             | 85.22                                                         | /                                                                            | /                                                             |
| H1-I1-I2              | /                                                             | /                                                                            | 71.59                                                         |
| C11-I1-I2             | 176.49                                                        | 175.52                                                                       | /                                                             |
| I1-I2-C11             | /                                                             | /                                                                            | 175.85                                                        |
| C1-N1-H1-C11          | 172.99                                                        | /                                                                            | 163.59                                                        |
| Se1-C7-C8-C13         | 29.54                                                         | 2.66                                                                         | 29.75                                                         |
| C1-N1-C5-Se1          | 179.48                                                        | 179.51                                                                       | 178.91                                                        |

<sup>a</sup>Average calculated for the three independent [I<sub>2</sub>Cl]<sup>-</sup> systems in the unit cell of **2**.

**Table S10.** Optimised geometry calculated for  $\{[\text{HL}]^+\cdots[\text{I-I-Cl}]^-\}$  (**II**) at DFT level (mPW1PW//LANL2DZ(d,p)) in the gas phase (total charge = 0, spin multiplicity = 1) in orthogonal Cartesian coordinate format ( $Z$  = atomic number).

| Atom number | $Z$ | $x$       | $y$       | $z$       |
|-------------|-----|-----------|-----------|-----------|
| 1           | 34  | 1.118284  | 0.029890  | -0.810164 |
| 2           | 7   | -1.046281 | 1.911960  | -0.835683 |
| 3           | 1   | -1.594679 | 1.142191  | -1.306227 |
| 4           | 6   | -1.621915 | 3.090898  | -0.562454 |
| 5           | 1   | -2.660932 | 3.195998  | -0.859458 |
| 6           | 6   | -0.895977 | 4.087663  | 0.079348  |
| 7           | 1   | -1.377100 | 5.036039  | 0.300942  |
| 8           | 6   | 0.431543  | 3.849392  | 0.437461  |
| 9           | 1   | 1.007101  | 4.620074  | 0.947859  |
| 10          | 6   | 1.024680  | 2.611038  | 0.147672  |
| 11          | 6   | 0.225234  | 1.639653  | -0.506482 |
| 12          | 6   | 2.348364  | 2.145207  | 0.436377  |
| 13          | 1   | 3.072801  | 2.757170  | 0.968412  |
| 14          | 6   | 2.611238  | 0.861562  | 0.042862  |
| 15          | 6   | 3.865604  | 0.122233  | 0.199853  |
| 16          | 6   | 5.096972  | 0.804750  | 0.224088  |
| 17          | 1   | 5.117350  | 1.884731  | 0.089423  |
| 18          | 6   | 6.290117  | 0.109642  | 0.384909  |
| 19          | 1   | 7.230516  | 0.660716  | 0.393582  |
| 20          | 6   | 6.307144  | -1.288630 | 0.522376  |
| 21          | 6   | 5.081226  | -1.964512 | 0.490978  |
| 22          | 1   | 5.063400  | -3.048308 | 0.599695  |
| 23          | 6   | 3.879992  | -1.275486 | 0.332828  |
| 24          | 1   | 2.942939  | -1.832585 | 0.343348  |
| 25          | 6   | 7.605024  | -2.027954 | 0.692415  |
| 26          | 1   | 7.440986  | -3.106845 | 0.780995  |
| 27          | 1   | 8.135469  | -1.689970 | 1.592046  |
| 28          | 1   | 8.271534  | -1.854607 | -0.162372 |
| 29          | 53  | -2.866416 | -0.811451 | 0.913247  |
| 30          | 17  | -3.274887 | -0.542384 | 3.366187  |
| 31          | 53  | -2.250134 | -0.951181 | -2.095464 |

**Table S11.** Optimised geometry calculated for  $[\text{Cl-I-I}]^- \cdots \text{I}_2 \cdots [\text{I-I-Cl}]^-$  (**III**) at DFT level (mPW1PW//LANL2DZ(d,p)) in the gas phase (total charge = -2, spin multiplicity = 1) in orthogonal Cartesian coordinate format ( $Z$  = atomic number).

| <b>Atom number</b> | <b>Z</b> | <b>x</b>  | <b>y</b>  | <b>z</b>  |
|--------------------|----------|-----------|-----------|-----------|
| 1                  | 53       | 1.378255  | -0.025286 | -0.005620 |
| 2                  | 53       | -1.374624 | 0.026560  | 0.005733  |
| 3                  | 53       | -6.913309 | -0.888460 | -0.020770 |
| 4                  | 53       | 6.912219  | 0.888104  | 0.020720  |
| 5                  | 17       | -4.594800 | 0.384503  | 0.032085  |
| 6                  | 17       | 4.595506  | -0.388706 | -0.032266 |
| 7                  | 53       | -9.520214 | -2.229847 | -0.076627 |
| 8                  | 53       | 9.516921  | 2.233173  | 0.076753  |

**Table S12.** Selected optimised bond lengths (Å) and angles (°) calculated at the DFT level (mPW1PW//LANL2DZ(d,p)) in the gas phase for {[Cl–I–I]<sup>–</sup>⋯I<sub>2</sub>⋯[I–I–Cl]<sup>–</sup>} (**III**) and {[I–I–Cl]<sup>–</sup>⋯I<sub>2</sub>⋯[Cl–I–I]<sup>–</sup>} (**IV**) with corresponding structural data for {[Cl–I–I]<sup>–</sup>⋯I<sub>2</sub>⋯[I–I–Cl]<sup>–</sup>} (**III**); numbering scheme as in Figure S9.

|           | {[Cl–I–I] <sup>–</sup> ⋯I <sub>2</sub> ⋯[I–I–Cl] <sup>–</sup> }<br>(calculated) | {[Cl–I–I] <sup>–</sup> ⋯I <sub>2</sub> ⋯[I–I–Cl] <sup>–</sup> }<br>(experimental) | {[I–I–Cl] <sup>–</sup> ⋯I <sub>2</sub> ⋯[Cl–I–I] <sup>–</sup> }<br>(calculated) |
|-----------|---------------------------------------------------------------------------------|-----------------------------------------------------------------------------------|---------------------------------------------------------------------------------|
| C11-I1    | 2.637                                                                           | 2.702                                                                             | /                                                                               |
| I1-I2     | 2.940                                                                           | 2.830                                                                             | 2.932                                                                           |
| I2-C11    | /                                                                               | /                                                                                 | 2.645                                                                           |
| I2-I3     | 3.545                                                                           | 3.286                                                                             | /                                                                               |
| C11-I3    | /                                                                               | /                                                                                 | 3.240                                                                           |
| I3-I4     | 2.788                                                                           | 2.743                                                                             | 2.753                                                                           |
| I4-I5     | 3.536                                                                           | 3.286                                                                             | /                                                                               |
| I5-I6     | 2.941                                                                           | 2.830                                                                             | 2.932                                                                           |
| I6-C12    | 2.635                                                                           | 2.702                                                                             | /                                                                               |
| I4-C12    | /                                                                               | /                                                                                 | 3.238                                                                           |
| C12-I5    | /                                                                               | /                                                                                 | 2.646                                                                           |
| C11-I1-I2 | 178.29                                                                          | 175.24                                                                            | /                                                                               |
| I1-I2-C11 | /                                                                               | /                                                                                 | 178.46                                                                          |
| I1-I2-I3  | 130.23                                                                          | 99.94                                                                             | /                                                                               |
| I2-C11-I3 | /                                                                               | /                                                                                 | 144.85                                                                          |
| I2-I3-I4  | 172.42                                                                          | 172.59                                                                            | /                                                                               |
| C11-I3-I4 | /                                                                               | /                                                                                 | 174.73                                                                          |
| I3-I4-I5  | 172.58                                                                          | 172.59                                                                            | /                                                                               |
| I3-I4-C12 | /                                                                               | /                                                                                 | 174.63                                                                          |
| I4-I5-I6  | 129.37                                                                          | 99.94                                                                             | /                                                                               |
| I4-C12-I5 | /                                                                               | /                                                                                 | 144.66                                                                          |
| I5-I6-C12 | 178.32                                                                          | 175.24                                                                            | /                                                                               |
| C12-I4-I5 | /                                                                               | /                                                                                 | 178.45                                                                          |

**Table S13.** Optimised geometry calculated for  $\{[\text{I}-\text{I}-\text{Cl}]^- \cdots \text{I}_2 \cdots [\text{Cl}-\text{I}-\text{I}]^-\}$  (**IV**) at DFT level (mPW1PW//LANL2DZ(d,p)) in the gas phase (total charge = -2, spin multiplicity = 1) in orthogonal Cartesian coordinate format ( $Z$  = atomic number).

| <b>Atom number</b> | <b><math>Z</math></b> | <b><math>x</math></b> | <b><math>y</math></b> | <b><math>z</math></b> |
|--------------------|-----------------------|-----------------------|-----------------------|-----------------------|
| 1                  | 53                    | 5.789309              | 10.120304             | 15.779151             |
| 2                  | 53                    | 4.448717              | 12.350462             | 16.779267             |
| 3                  | 53                    | 0.964511              | 16.022658             | 19.788451             |
| 4                  | 53                    | 2.990155              | 15.435764             | 17.739670             |
| 5                  | 17                    | -0.847931             | 16.624970             | 21.606602             |
| 6                  | 53                    | 9.276868              | 6.511384              | 12.752001             |
| 7                  | 53                    | 7.250001              | 7.047771              | 14.814816             |
| 8                  | 17                    | 11.089571             | 5.955987              | 10.922043             |

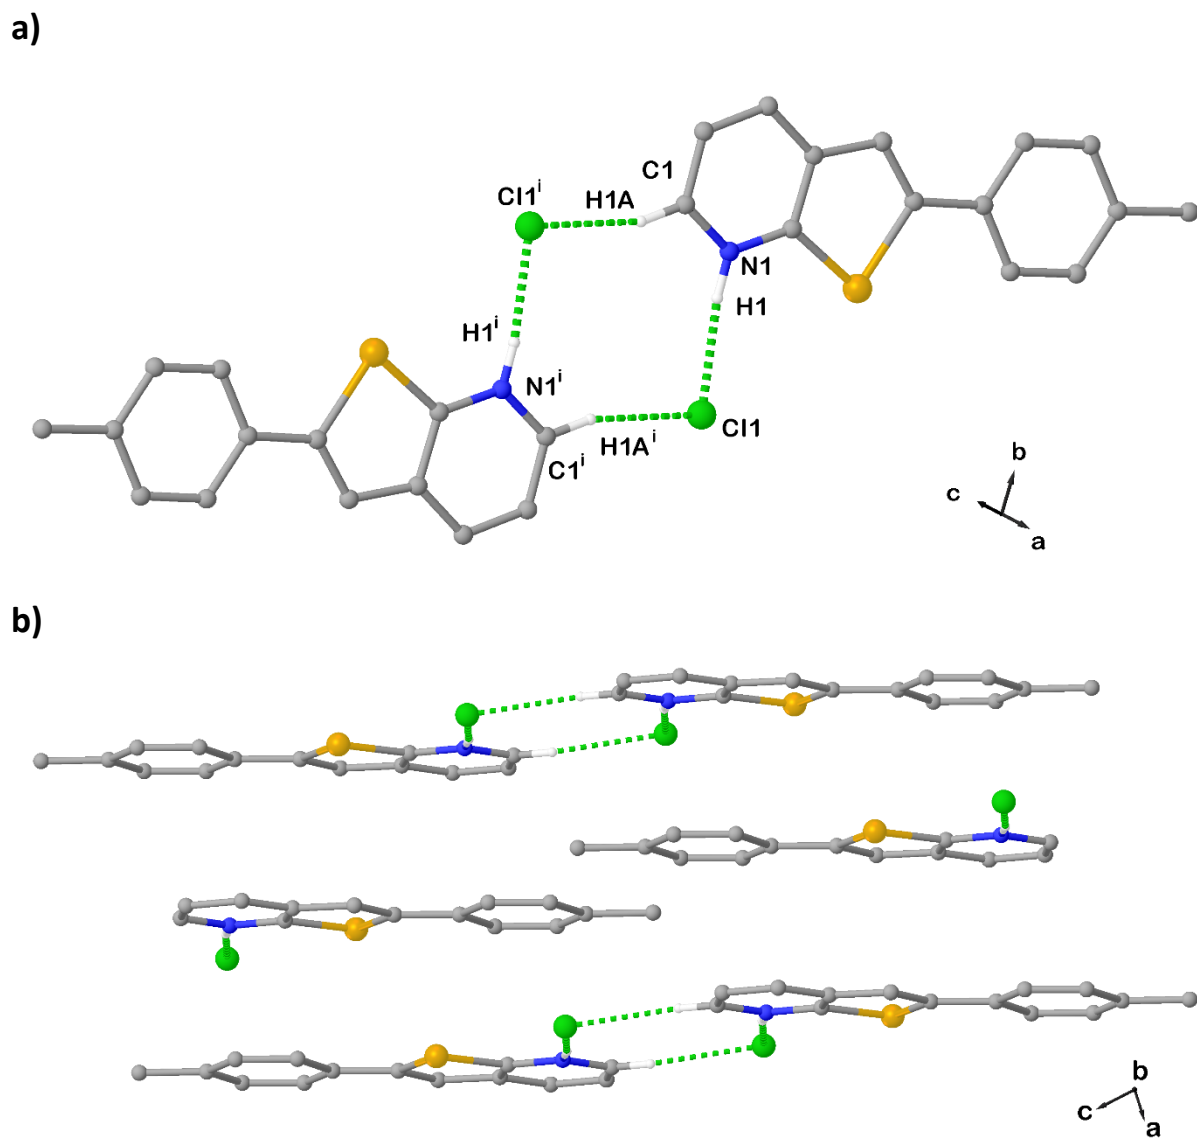

**Figure S1.** a) View along the [101] direction of the hydrogen-bonded dimeric arrangement found in **1**. Relevant bond lengths and angles are listed in Table S4. b) Packing diagram of **1** viewed along the *b* axis. Symmetry code:  $i = -x, 2-y, 2-z$ .



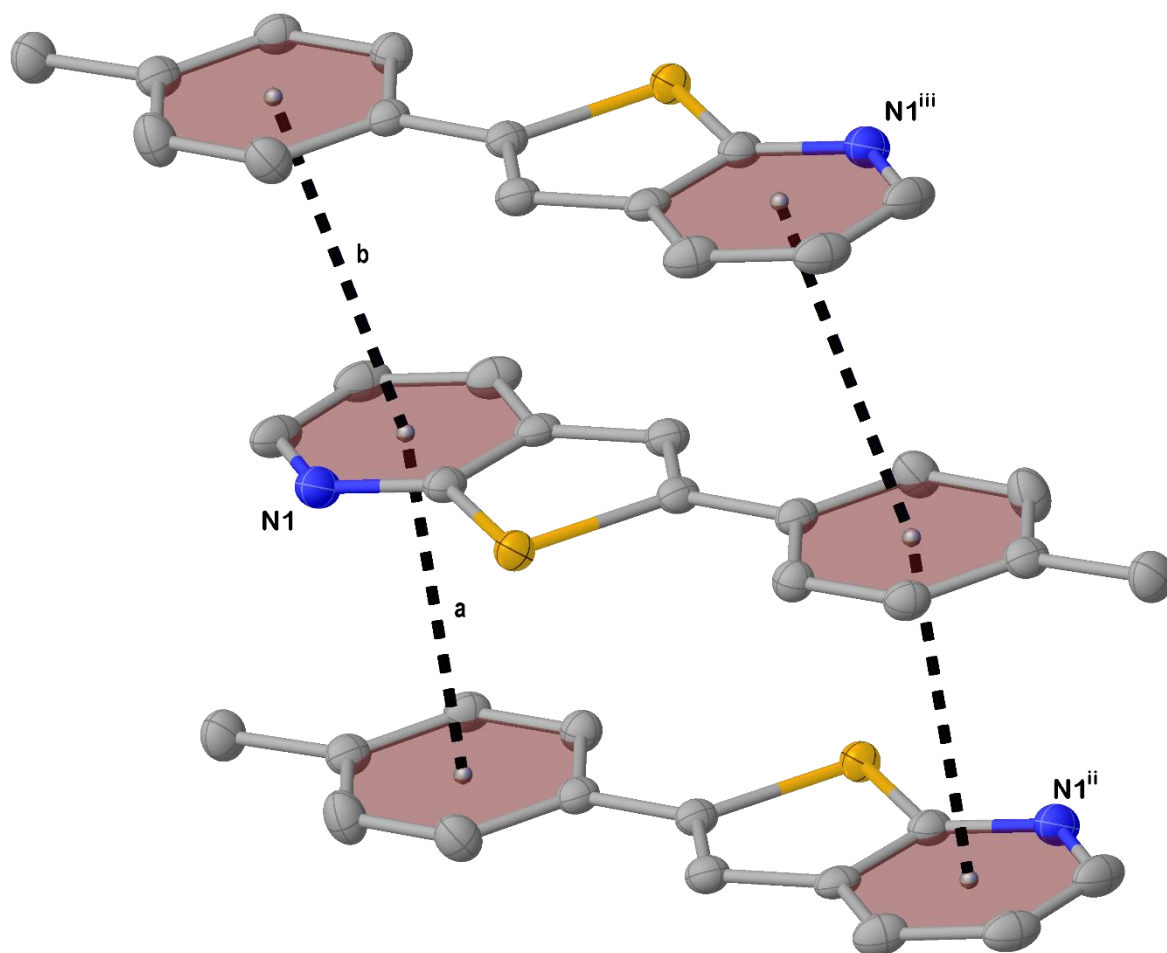

| Interaction | Angle (°) | Centroid to centroid distance (Å) | Shift distance (Å) |
|-------------|-----------|-----------------------------------|--------------------|
| a           | 1.24      | 3.61                              | 1.17               |
| b           | 2.65      | 3.74                              | 1.51               |

Symmetry codes: <sup>ii</sup> = 1-x, 1-y, 1-z; <sup>iii</sup> = 2-x, 1-y, 1-z.

**Figure S2.** Partial view along the [011] direction of a cationic  $\pi$ - $\pi$  stacked layer found in compound **1** with relevant interactions are described below.

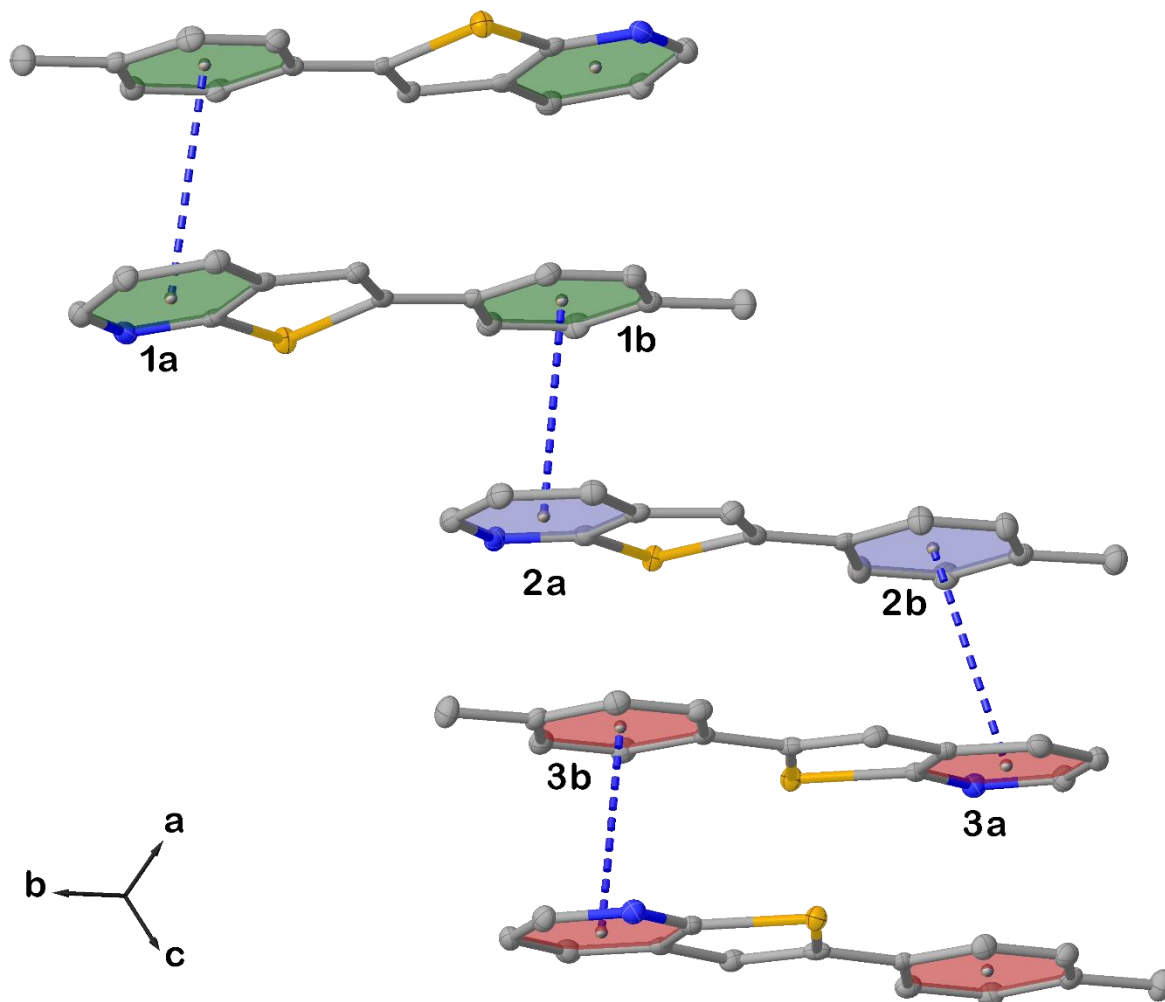

| Planes                            | Angle (°) | Centroid to centroid distance (Å) | Shift distance (Å) |
|-----------------------------------|-----------|-----------------------------------|--------------------|
| 1a-1b <sup>viii</sup>             | 5.86      | 3.60                              | 1.24               |
| 1b-2a                             | 3.35      | 3.46                              | 0.78               |
| 2b-3a <sup>ix</sup>               | 5.52      | 3.46                              | 1.10               |
| 3a <sup>x</sup> -3b <sup>ix</sup> | 2.37      | 3.54                              | 1.14               |

Symmetry codes: <sup>vii</sup> =  $2-x, 1-y, 1-z$ ; <sup>ix</sup> =  $1-x, -y, 1-z$ ; <sup>x</sup> =  $+x, +y, 1+z$ .

Planes: **1a** = N1-C1-C2-C3-C4-C5; **1b** = C8-C9-C10-C11-C12-C13; **2a** = N2-C16-C17-C18-C19-C15; **2b** = C22-C23-C24-C25-C26-C27; **3a** = N3-C29-C30-C31-C32-C33; **3b** = C36-C37-C38-C39-C40-C41.

**Figure S3.** Partial view along the [111] direction of a cationic layer found in compound **2** with intermolecular  $\pi$ - $\pi$  interactions.

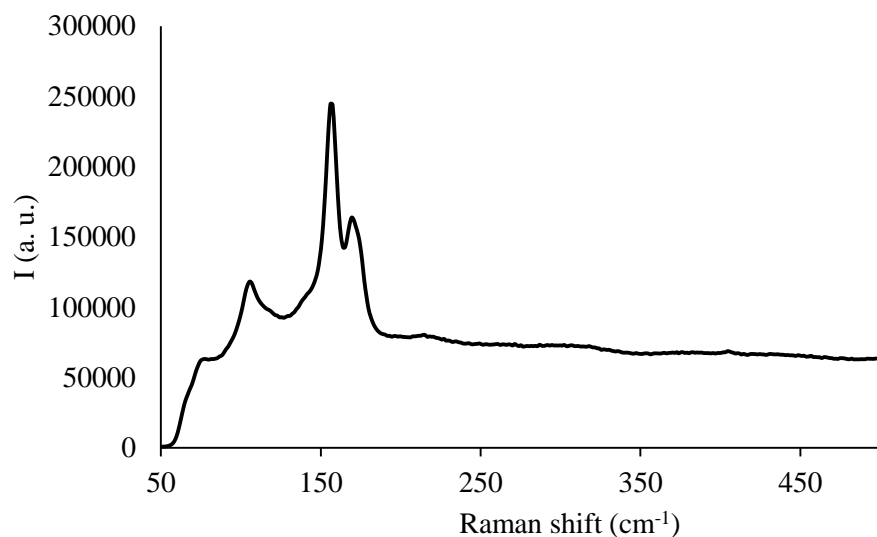

**Figure S4.** Raman spectrum of compound **2**.

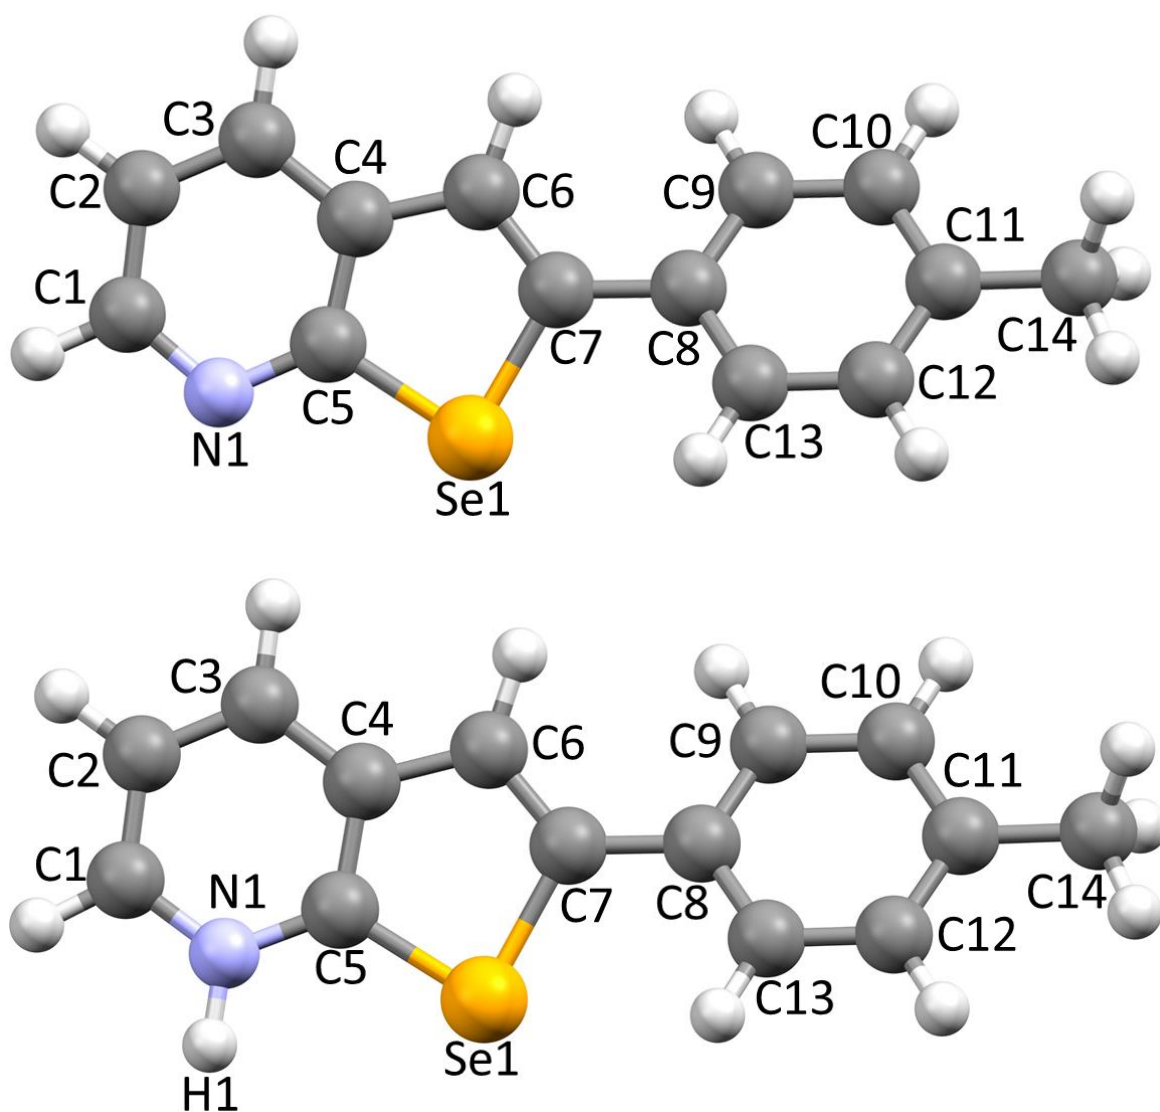

**Figure S5.** Molecular structure and atom labelling scheme calculated at the DFT level (mPW1PW//LANL2DZ(d,p)) in the gas phase for **L** (top) and **[HL]<sup>+</sup>** (bottom).

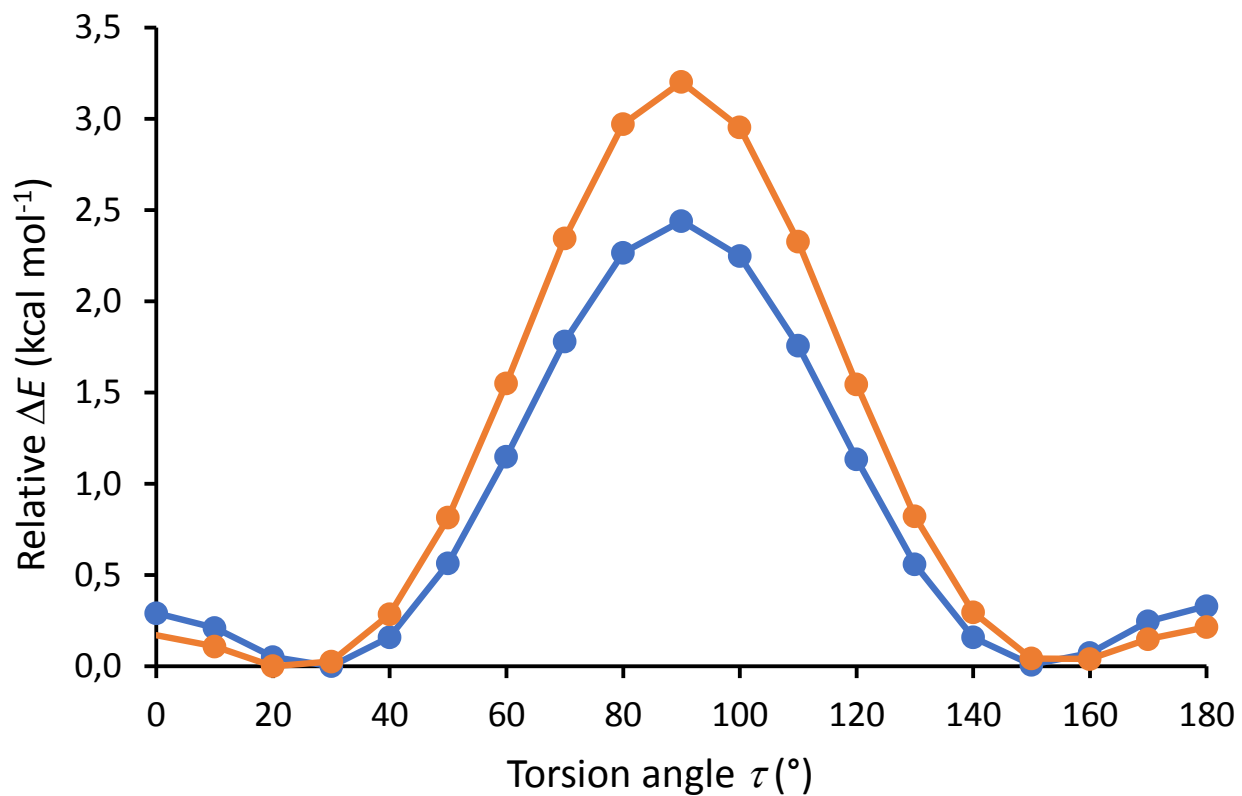

**Figure S6.** Relative energy variation  $\Delta E$  of the total electronic energy as a function of torsion angle  $\tau$  (Se1-C7-C8-C13; atom labelling scheme as in Figure S5) calculated for **L** (blue line) and **[HL]<sup>+</sup>** (orange line) at the DFT level (mPW1PW//LANL2DZ(d,p)).

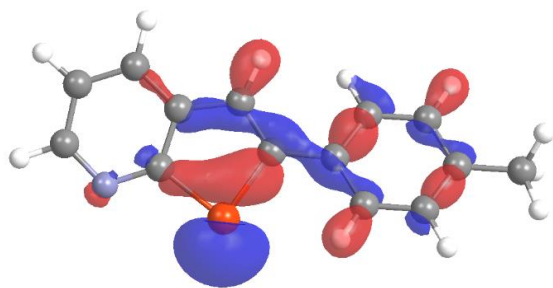

HOMO-6

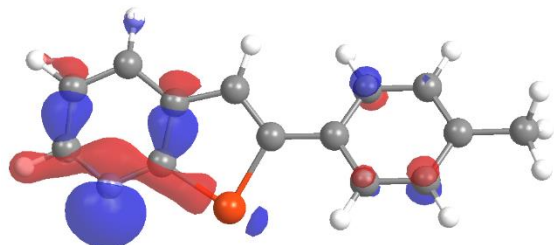

HOMO-4

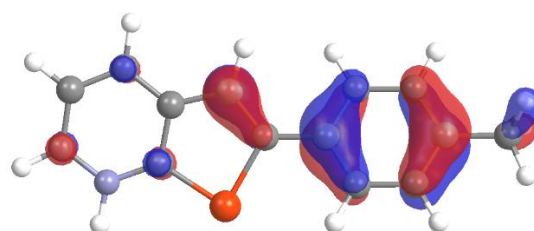

HOMO

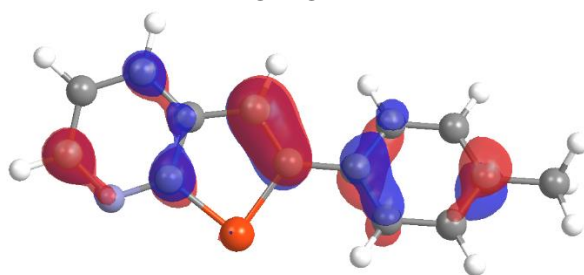

HOMO

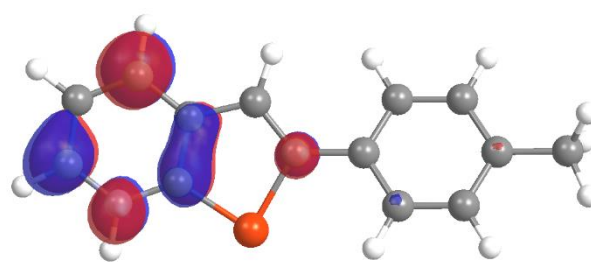

LUMO

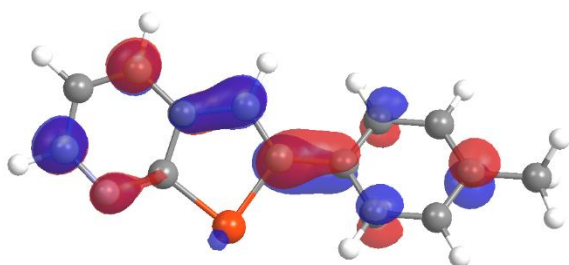

LUMO

**Figure S7.** Isosurfaces of selected frontier KS-MOs calculated for **L** (left) and **[HL]<sup>+</sup>** (right) at the DFT level (mPW1PW// LANL2DZ(d,p)) in the gas phase; isovalue 0.05 |e|.

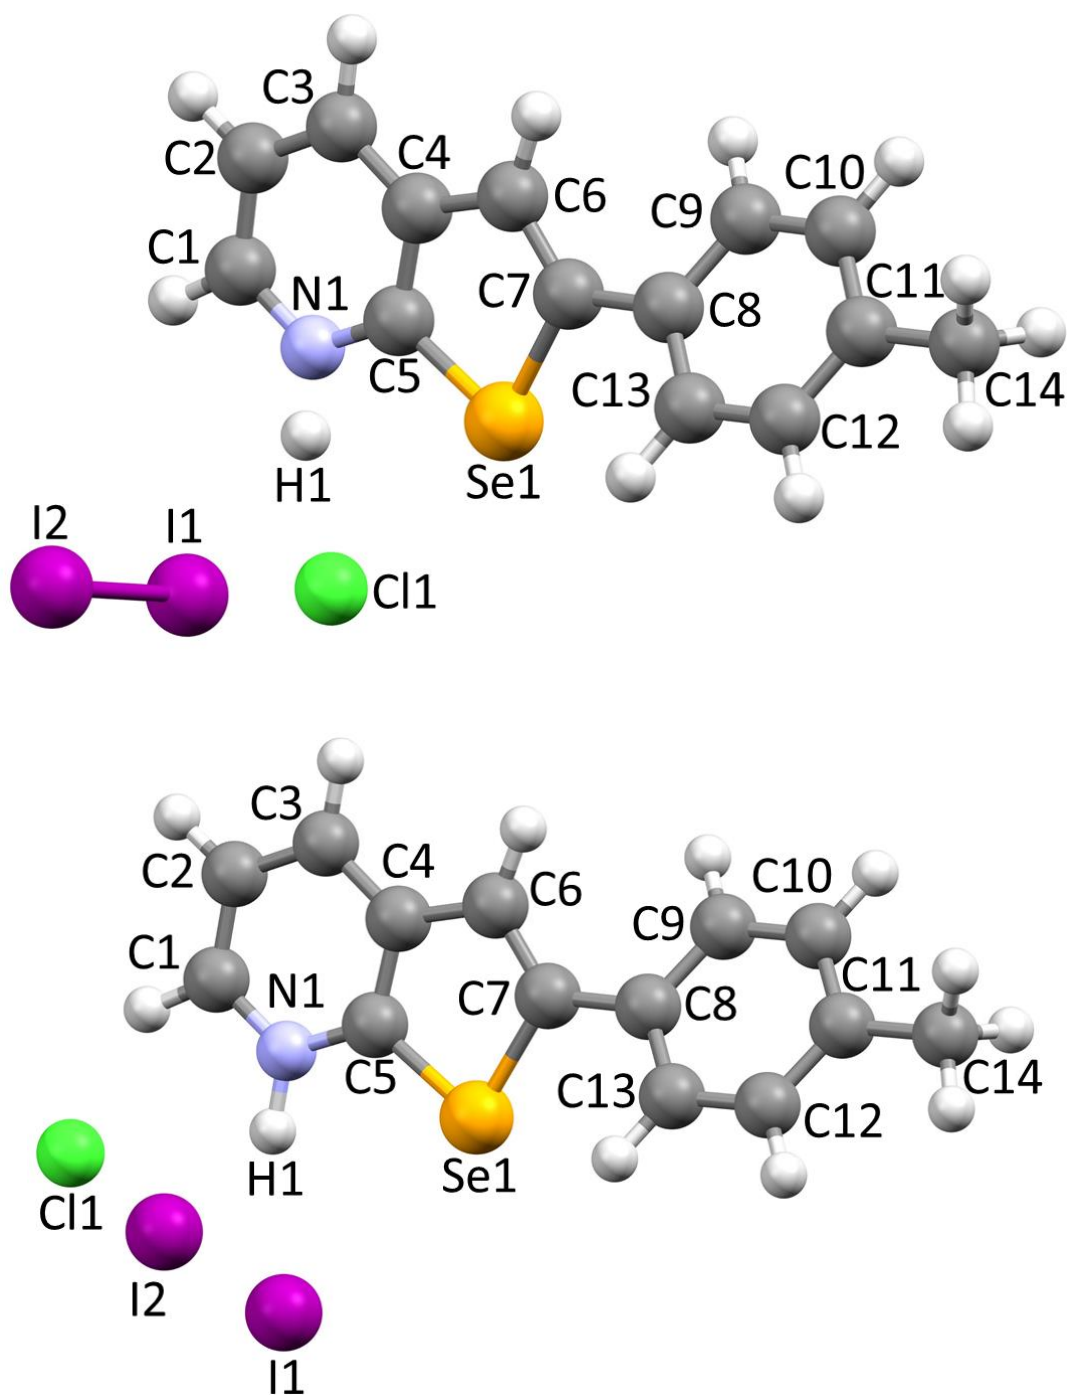

**Figure S8.** Molecular structure and atom labelling scheme calculated at the DFT level (mPW1PW//LANL2DZ(d,p)) in the gas phase for  $\{[\text{LH}]^+\cdots[\text{Cl-I-I}]^-\}$  (**I**, top) and  $\{[\text{LH}]^+\cdots[\text{I-I-Cl}]^-\}$  (**II**, bottom).

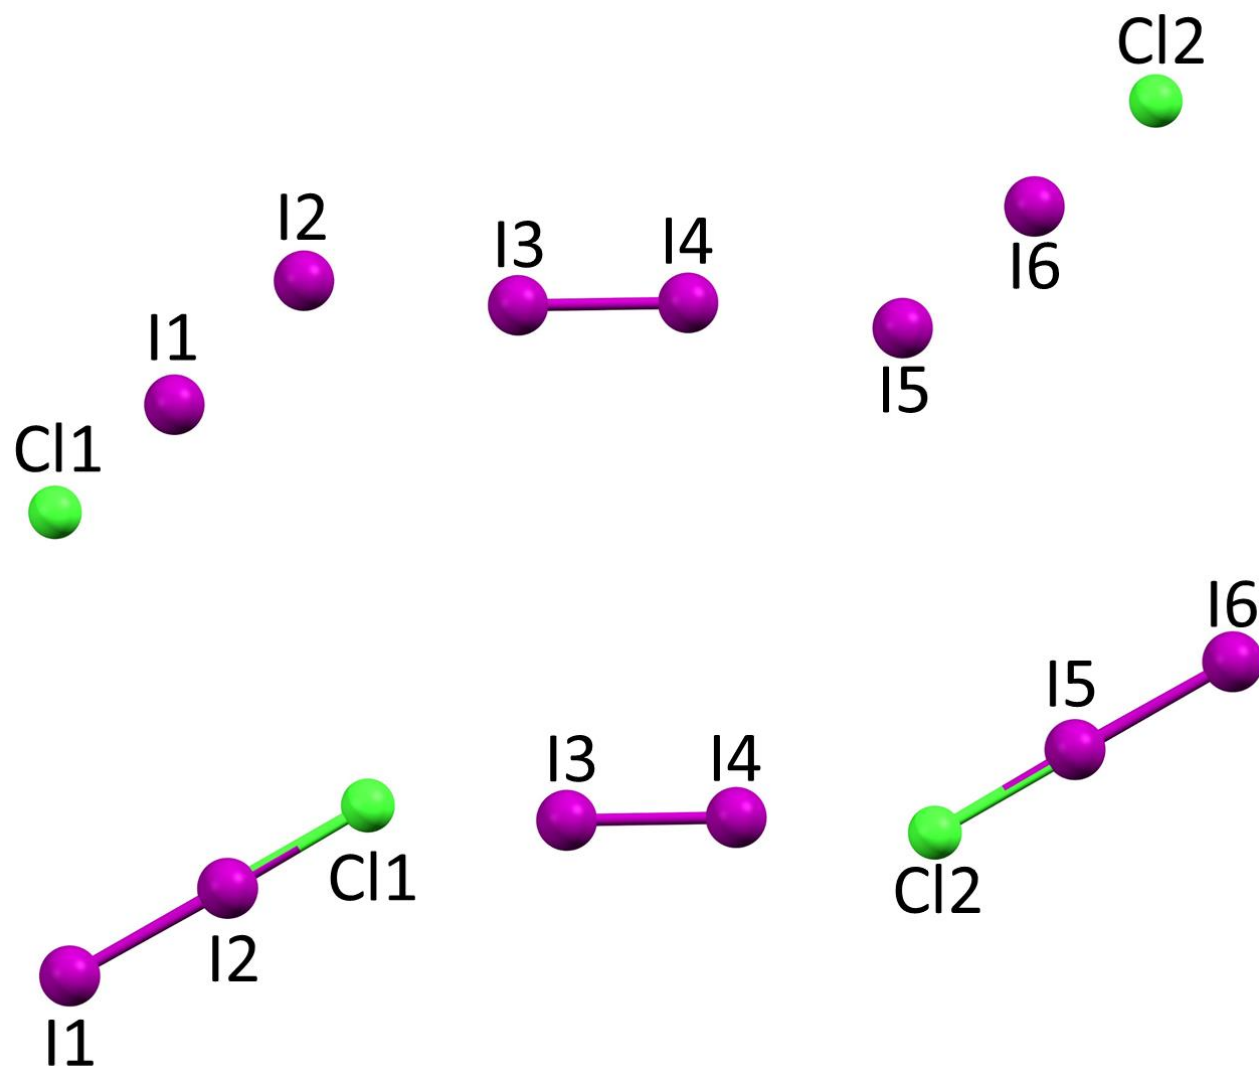

**Figure S9.** Molecular structure and atom labelling scheme calculated at the DFT level (mPW1PW//LANL2DZ(d,p)) in the gas phase for  $\{[\text{Cl-I-I}]^- \cdots \text{I}_2 \cdots [\text{I-I-Cl}]^-\}$  (**III**, top) and  $\{[\text{I-I-Cl}]^- \cdots \text{I}_2 \cdots [\text{Cl-I-I}]^-\}$  (**IV**, bottom).
